# Supplementary material for: Exohedrally stabilized C70 isomer with adjacent pentagons characterized by crystallography
Source: Royal Society of Chemistry journal article supplement (doi:10.1039/c3sc50141h), 2013-01-01
Supplement: c3sc50141h.pdf [file c3sc50141h.pdf]

# Electronic Supplementary Information

## Exohedrally stabilized C<sub>70</sub> isomer with adjacent pentagons characterized by crystallography

Yuan-Zhi Tan, Jia Li, Ming-Yue Du, Shui-Chao Lin, Su-Yuan Xie,\* Xin Lu,\*  
Rong-Bin Huang, Lan-Sun Zheng

*State Key Laboratory for Physical Chemistry of Solid Surface & Department of Chemistry,  
College of Chemistry and Chemical Engineering, Xiamen University, Xiamen, 361005E-mail:  
syxie@xmu.edu.cn; xinlu@xmu.edu.cn*

### Contents

1. Multi-stage separation of <sup>#8064</sup>C<sub>70</sub>Cl<sub>10</sub> by HPLC.
2. Crystallographic identification for <sup>#8064</sup>C<sub>70</sub>Cl<sub>10</sub>.
3. Computational details.
4. Coordinates of optimized pristine <sup>#8064</sup>C<sub>70</sub>.

## 1. Multi-stage separation of $^{8064}\text{C}_{70}\text{Cl}_{10}$ by HPLC.

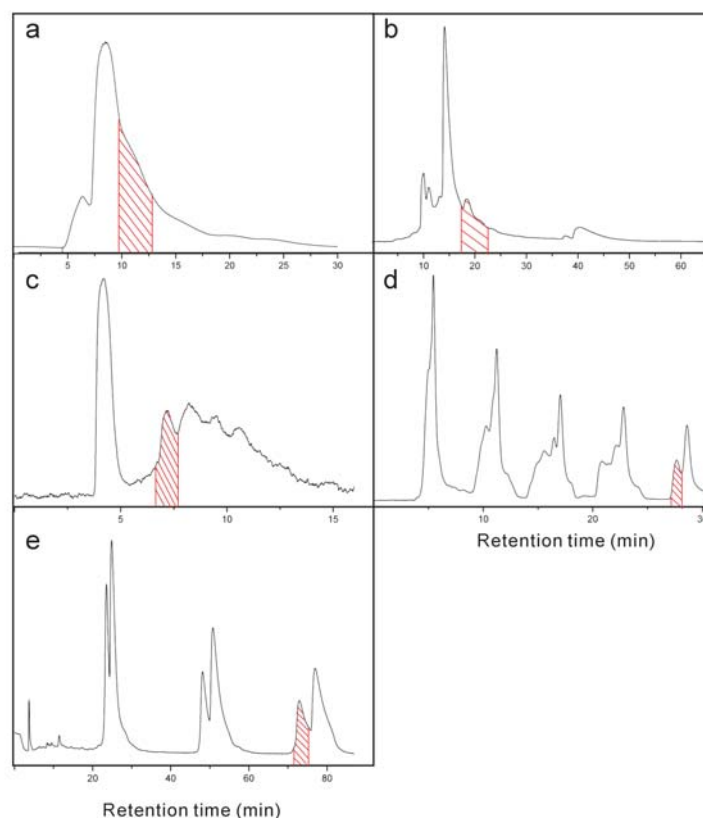

**Figure S1. Multi-stage HPLC chromatograms for the separation of  $^{8064}\text{C}_{70}\text{Cl}_{10}$ .**

**The collected components were highlighted by red shadow.**

The procedure for the purification of  $^{8064}\text{C}_{70}\text{Cl}_{10}$  includes five stages of HPLC runs, of which the last two runs were performed in a recyclic mode. All the separations were carried out at room temperature using toluene as the eluant. The crude toluene extraction of carbon soot was first separated using a pyrenebutyric acid bonded silica column (I.D. 20 × 250 mm) at a flow rate of 10 ml/min, and the component with the retention time ranging from 9.0 to 13.0 min was collected for the subsequent HPLC stage (Fig. S1a). Then a buckyprep column (I.D. 10 × 250 mm) was used to separate the collected sample at a flow rate of 4 ml/min, and the component with retention time from 17.5 to 22.5 min was collected (Fig. S1b). The third stage of the isolation was performed using a buckyprep-M column (I.D. 10 × 250 mm) at a flow rate of 4 ml/min, and collecting the component ranging from 6.1 to 7.5 min (Fig. S1c). The following two steps of the isolation were performed using recyclic HPLC. The sample was isolated by a 5PBB column at a flow rate of 4 ml/min, and then the peak containing  $\text{C}_{70}\text{Cl}_{10}$  was collected after fifth cycles (Fig. S1d). The obtained sample was further purified by a

buckyprep column (I.D.  $4.6 \times 250$  mm) at a flow rate of 1 ml/min (Fig. S1e). The component highlighted by the red shadow in Fig. S1e was corresponded to the purified  $^{8064}\text{C}_{70}\text{Cl}_{10}$ .

## 2. Crystallographic identification for $^{8064}\text{C}_{70}\text{Cl}_{10}$ .

By evaporation of its chloroform solution, single crystals of  $^{8064}\text{C}_{70}\text{Cl}_{10}$  were obtained. X-ray diffraction data were collected on a Bruker CCD diffractometer (MoK $\alpha$  radiation (0.71073 Å), graphite monochromator). The structure was solved and refined using SHELTXL.<sup>1</sup> CCDC 809403 contains the crystallographic data of  $^{8064}\text{C}_{70}\text{Cl}_{10}$  can be obtained free of charge from the Cambridge Crystallographic Data Centre via [www.ccdc.cam.ac.uk/data\\_request/cif](http://www.ccdc.cam.ac.uk/data_request/cif).

## 3. Computational details.

The geometrical optimization and electronic structure of pristine  $^{8064}\text{C}_{70}$  was calculated at the GGA/DNP level, in which the generalized gradient approximation (GGA) in the Perdew, Burke, and Ernzerhof (PBE)<sup>2</sup> form as well as a double numerical polarized (DNP) basis set were employed. The nucleus independent chemical shifts (NICS)<sup>3,4</sup> at the center of the rings in the remainder carbon framework were calculated at B3LYP/6-31G\*<sup>5,6</sup> level of theory. All of the computation works were performed using the DMol<sup>3</sup> code<sup>7,8</sup> and Gaussian03 program<sup>9</sup>. Fig. S2 shows the HOMO and LUMO of  $^{8064}\text{C}_{70}$ . The amounts of Kekulé structures for the three  $\text{C}_{30}\text{H}_{12}$  isomers are indicated in Fig. S3, and the NICS values for the ring centers of the  $\text{C}_{30}$  fragments shown in Fig. S4 are listed in Table S1.

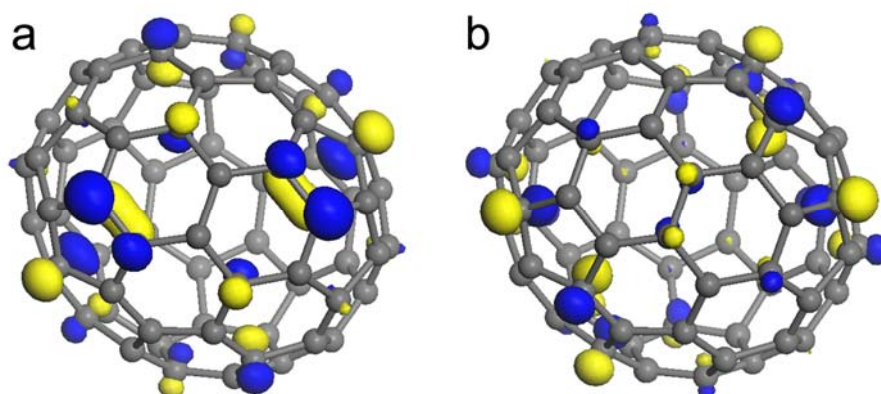

**Figure S2. The HOMO (a) and LUMO (b) of  $^{8064}\text{C}_{70}$ .**

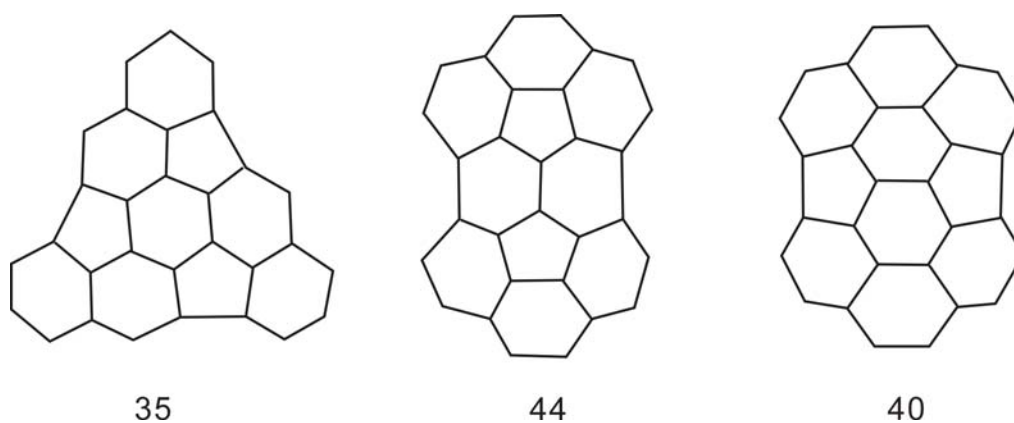

**Figure S3. The frameworks of the three  $C_{30}H_{12}$  isomers. The amounts of Kekulé structures are written below the frameworks.**

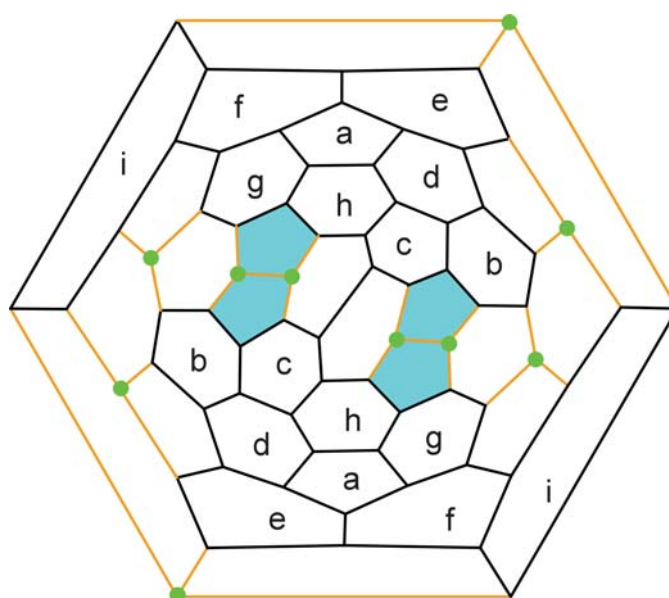

**Figure S4. The numeration of the rings in the  $C_{30}$  fragments.**

**Table S1. B3LYP/6-31G\* calculated NICS values of the ring centers**

| Ring | NICS  |
|------|-------|
| a    | - 1.7 |
| b    | -12.8 |
| c    | -5.3  |
| d    | -7.2  |
| e    | -10.4 |
| f    | -8.8  |
| g    | -10.4 |
| h    | -13.5 |
| i    | -12.1 |

#### 4. Coordinates of the optimized pristine <sup>#8064</sup>C<sub>70</sub>.

| carbon | x        | y        | z        | carbon | x        | y        | z        |
|--------|----------|----------|----------|--------|----------|----------|----------|
| 1      | 3.82383  | -0.57193 | -0.19827 | 36     | 0.31944  | -2.6612  | -2.43882 |
| 2      | 2.55449  | -2.58413 | 0.34354  | 37     | 2.28138  | 1.46717  | -2.78965 |
| 3      | -3.2893  | 1.79635  | -0.59276 | 38     | -2.54786 | 0.83419  | -2.71909 |
| 4      | -0.59404 | 0.44143  | 3.35208  | 39     | 1.10877  | 0.86169  | -3.39719 |
| 5      | 1.54521  | -2.85366 | -1.73646 | 40     | -3.63197 | -1.37441 | 1.05425  |
| 6      | -0.95764 | -2.32409 | 3.18801  | 41     | -2.28245 | 2.08673  | 1.66314  |
| 7      | 2.0691   | 1.47612  | 2.93062  | 42     | 0.27957  | -3.588   | 1.66494  |
| 8      | -1.28216 | 0.56025  | -3.37951 | 43     | 2.90723  | 2.14305  | 1.94547  |
| 9      | -1.55434 | 3.336    | -0.38391 | 44     | 2.92028  | 2.81059  | -0.82681 |
| 10     | -2.55449 | 2.58413  | 0.34354  | 45     | 3.60051  | -0.06745 | 1.13925  |
| 11     | -2.73189 | 0.74534  | 2.03991  | 46     | 2.73189  | -0.74534 | 2.03991  |
| 12     | -1.54521 | 2.85366  | -1.73646 | 47     | -2.18794 | -3.32229 | 1.47079  |
| 13     | -0.37946 | 3.81054  | 0.25261  | 48     | -3.60051 | 0.06745  | 1.13925  |
| 14     | 3.2893   | -1.79635 | -0.59276 | 49     | -0.84673 | -3.22665 | -1.8397  |
| 15     | 0.35833  | -1.82612 | 3.22258  | 50     | 0.59404  | -0.44143 | 3.35208  |
| 16     | 3.83393  | 0.54317  | -1.12315 | 51     | 3.63197  | 1.37441  | 1.05425  |
| 17     | -2.11144 | -3.57837 | 0.0928   | 52     | 2.15352  | 2.6341   | -2.04115 |
| 18     | -2.0691  | -1.47612 | 2.93062  | 53     | -1.89433 | -0.06571 | 2.93211  |
| 19     | -0.35833 | 1.82612  | 3.22258  | 54     | -1.00063 | -3.41625 | 2.24567  |
| 20     | 1.89433  | 0.06571  | 2.93211  | 55     | -0.82276 | -3.82292 | -0.5274  |
| 21     | -2.92028 | -2.81059 | -0.82681 | 56     | -1.10877 | -0.86169 | -3.39719 |
| 22     | -3.82383 | 0.57193  | -0.19827 | 57     | -3.17109 | -0.4178  | -2.35767 |
| 23     | -1.16293 | 2.63846  | 2.31548  | 58     | 2.65215  | -1.93919 | -1.8861  |
| 24     | -3.71051 | -1.75325 | -0.35436 | 59     | -2.15352 | -2.6341  | -2.04115 |
| 25     | -3.83393 | -0.54317 | -1.12315 | 60     | -2.28138 | -1.46717 | -2.78965 |
| 26     | -0.31944 | 2.6612   | -2.43882 | 61     | -2.90723 | -2.14305 | 1.94547  |
| 27     | 2.11144  | 3.57837  | 0.0928   | 62     | 3.71051  | 1.75325  | -0.35436 |
| 28     | 2.18794  | 3.32229  | 1.47079  | 63     | 2.54786  | -0.83419 | -2.71909 |
| 29     | 1.55434  | -3.336   | -0.38391 | 64     | 0.37946  | -3.81054 | 0.25261  |
| 30     | -0.17869 | 1.4526   | -3.26123 | 65     | 0.95764  | 2.32409  | 3.18801  |
| 31     | 1.16293  | -2.63846 | 2.31548  | 66     | -2.65215 | 1.93919  | -1.8861  |
| 32     | 1.00063  | 3.41625  | 2.24567  | 67     | 0.17869  | -1.4526  | -3.26123 |
| 33     | 0.82276  | 3.82292  | -0.5274  | 68     | 3.17109  | 0.4178   | -2.35767 |
| 34     | 0.84673  | 3.22665  | -1.8397  | 69     | 2.28245  | -2.08673 | 1.66314  |
| 35     | -0.27957 | 3.588    | 1.66494  | 70     | 1.28216  | -0.56025 | -3.37951 |

## References

1. G. M. Sheldrick, *Acta Crystallogr. A*, 2008, **A64**, 112.
2. J. P. Perdew, K. Burke and M. Ernzerhof, *Phys. Rev. Lett.*, 1996, **77**, 3865.
3. Z. Chen, C. S. Wannere, C. Corminboeuf, R. Puchta and P. v. R. Schleyer, *Chem. Rev.*, 2005, **105**, 3842.
4. P. v. R. Schleyer, C. Maerker, A. Dransfeld, H. Jiao and N. J. R. v. E. Hommes, *J. Am. Chem. Soc.*, 1996, **118**, 6317.
5. A. D. Becke, *J. Chem. Phys.*, 1993, **98**, 5648.
6. C. Lee, W. Yang and R. G. Parr, *Phys. Rev. B*, 1989, **37**, 785.
7. B. Delley, *J. Chem. Phys.*, 1990, **92**, 508.
8. B. Delley, *J. Chem. Phys.*, 2000, **113**, 7756.
9. Gaussian 03, Revision D.01, M. J. Frisch, et al., Gaussian, Inc., Wallingford CT, 2004.
